# Supplementary material for: A Study of Microplastic Particles in Danish Tap Water
Source: MDPI journal article supplement (doi:10.3390/w13152097), 2021-07-30
Supplement: s1 [file s1]

## Supplementary Information

Table S1. Description of sampling sites

| Site | Address<br>(Postal code)           | Date of<br>sampling<br>(2018) | Waterwork/<br>Water abstraction<br>area                                                                   | Description of water supply<br>network (material, age, length)                                                                                                                                    | Type of<br>building                                                                   |
|------|------------------------------------|-------------------------------|-----------------------------------------------------------------------------------------------------------|---------------------------------------------------------------------------------------------------------------------------------------------------------------------------------------------------|---------------------------------------------------------------------------------------|
| 1    | Knabrostræde<br>(1210 Kbh. K)      | 11 April<br>and<br>1 June     | Marbjerg, Lejre,<br>Slangerup,<br>Søndersø,<br>Regnemark,<br>Thorsbro<br>(Infrequently from<br>Islevbro). | Local water pipes: PE 90 mm,<br>from 2004.<br>Supply network: Mix of old cast<br>iron pipes and newer PE pipes.                                                                                   | Small shop,<br>older<br>building/<br>installations                                    |
| 2    | Eriksgade<br>(1708 Kbh. V)         | 11 April                      | Regnemark,<br>Thorsbro,<br>Slangerup,<br>Søndersø<br>(Infrequently from<br>Islevbro, Lejre,<br>Marbjerg). | Local water pipes: Cast iron 100<br>mm, from 1890.<br>Supply network: Mix of old cast<br>iron pipes and bonna pipes as well<br>as newer PE and PEH pipes.                                         | Apartment<br>building<br>(private<br>housing)                                         |
| 3    | Blegdamsvej<br>(2200 Kbh N)        | 2 May                         | Søndersø,<br>Slangerup, Lejre,<br>Marbjerg and<br>Islevbro<br>(Infrequently from<br>Regnemark).           | Local water pipes: Cast iron, 300<br>mm, from 1877 (Blegdamsvej) +<br>PE 160 mm from 2015 (Tagensvej)<br>+ private laterals.<br>Supply network: Mix of old cast<br>iron pipes and newer PE pipes. | Newer<br>building/<br>installations                                                   |
| 4    | Ernie Wilkins Vej<br>(2450 Kbh S.) | 2 May                         | Regnemark<br>(primarily) and<br>Thorsbro                                                                  | Local water pipes: PE 160 mm,<br>from 2007.<br>Supply network: Mix of old and<br>new cast iron pipes, Bonna pipes<br>from 1970's and newer PEH pipes.                                             | Apartment<br>building<br>(private<br>housing),<br>Newer<br>building/<br>installations |
| 5    | Saunte Bygade<br>(3100 Hornbæk)    | 4 April                       | Hellebæk                                                                                                  | Supply network: PVC, from 1950-<br>1970, DfW: 5.6 km                                                                                                                                              | Hotel                                                                                 |

|           |                                             |          |                             |                                                                                                                                                                                             |                                              |
|-----------|---------------------------------------------|----------|-----------------------------|---------------------------------------------------------------------------------------------------------------------------------------------------------------------------------------------|----------------------------------------------|
| <b>6</b>  | Kolibrivej<br>(4040 Jyllinge)               | 28 May   | Værebro                     | New supply network (PE) during the last 7 years. Raw water pipes were changed in 2017. New water meters and new wells (where available). Hence, it corresponds almost to a new water works. | Single-family house                          |
| <b>7</b>  | Østre Allé<br>(4800 Nykøbing F)             | 8 June   | Nykøbing F                  | Supply network: Primarily PE, from 2013. DfW: 1.9 km                                                                                                                                        | Single-family house                          |
| <b>8</b>  | Ore Strandpark<br>(4850 Stubbekøbing)       | 8 June   | Ore                         | Supply network: PVC, from 1963. DfW: 800 m                                                                                                                                                  | Single-family summer house                   |
| <b>9</b>  | Villestoftehegnet (5210 Odense NV)          | 26 April | Holmehaveværket             | Supply network: Concrete, from mid 70s (12.5 km).<br>Ductile iron, from 1980-1990 (9 km).<br>Mix of PVC (from 1971) and PE (from 1990) (5 km).                                              | Terrace house                                |
| <b>10</b> | Lindehaven<br>(5270 Odense)                 | 26 April | Lunde                       | Ductile iron, from 1997 (4 km).<br>PVC, from 1965 (3.3 km).<br>Local water pipes: PE, from 2017 (300 m).                                                                                    | Single-family house                          |
| <b>11</b> | Dagmargade<br>6000 Odense C)                | 26 April | Hovedværket                 | Supply network: Concrete, from 1948 (200 m).<br>Ductile iron, from 1987 (4 km).<br>Local water pipes: PE, from 1996 (240 m).                                                                | Apartment building (private housing)         |
| <b>12</b> | Hjelmallé<br>(6200 Aabenrå)                 | 19 April | Farversmølle/<br>Lindsnakke | Laterals: PVC, 110 mm (242 m).<br>Supply network: Eternit 150 mm (530 m)                                                                                                                    | Public institution (Sports facility)         |
| <b>13</b> | Lundsbjerg<br>Industrivej<br>(6200 Aabenrå) | 19 April | Farversmølle                | Laterals: PVC, from 1981.<br>Supply network: PVC 200 mm. DfW: 3.6 km, passing through Sønderskov cistern                                                                                    | Public institution (Educational institution) |

|           |                                       |          |                   |                                                                                                                                                                                                                                                                                                           |                     |
|-----------|---------------------------------------|----------|-------------------|-----------------------------------------------------------------------------------------------------------------------------------------------------------------------------------------------------------------------------------------------------------------------------------------------------------|---------------------|
| <b>14</b> | Kværsløkke<br>(6300 Gråsten)          | 19 April | Farversmølle      | Long supply network. Mix between PVC 75 mm (from the 1970s) and PE (newer)                                                                                                                                                                                                                                | Small company       |
| <b>15</b> | Aavangen<br>(9575 Terndrup)           | 16 May   | Terndrup          | Supply network: depending on water flow, mix of PVC/PEL (PE) with some parts in eternit.<br>Shortest DfW: 1.1 km;<br>160 mm PVC (430 m)<br>110 mm PVC (180 m)<br>75 mm PVC (450 m)<br>40 PVC (70 m), from 1990-2010                                                                                       | Public institution  |
| <b>16</b> | Gunnar Clausens vej<br>(8260 Viby J.) | 16 May   | Østerbyværket     | Supply network: two options, depending on water flow:<br>1) 225 mm PVC (1982) (600 m), 315 mm PE (2007) (3.5 km), 225 mm PVC (1971) (300 m)<br>2) 300 mm Eternit (1972-78) (1300 m), 315 mm PE (2014) (200 m), 300 mm Eternit (1972) (750 m), 315 mm PE (1999) (400 m), Mix of PE (500 m) and PVC (450 m) | Medium-size company |
| <b>17</b> | Kristtornvej<br>(8200 Aarhus N.)      | 16 May   | Truelsbjergværket | Supply network: 400 mm Eternit (1974) (3.1 km)<br>400 mm PVC (1989) (700m)<br>400 mm Eternit (1963-74) (1.2 km)<br>Mix of Eternit (400 m), PE (800 m), PVC (1.6 km) (1967-2014)                                                                                                                           | Double-family house |

Abbreviations: Distance from water works (DfW).

Figure S1. Stereomicroscopy and classification of characteristic particles >100  $\mu\text{m}$ . The pictures show examples of particles observed in the water samples and characterized as likely MP fibres (A-E); likely MP fragments (F,G,I) and likely MP films (H). Particles of inorganic and organic material resembling salts (J-K), quartz (L), proteinaceous (M), rust (N) or metallic particles (O) were disregarded as MP.

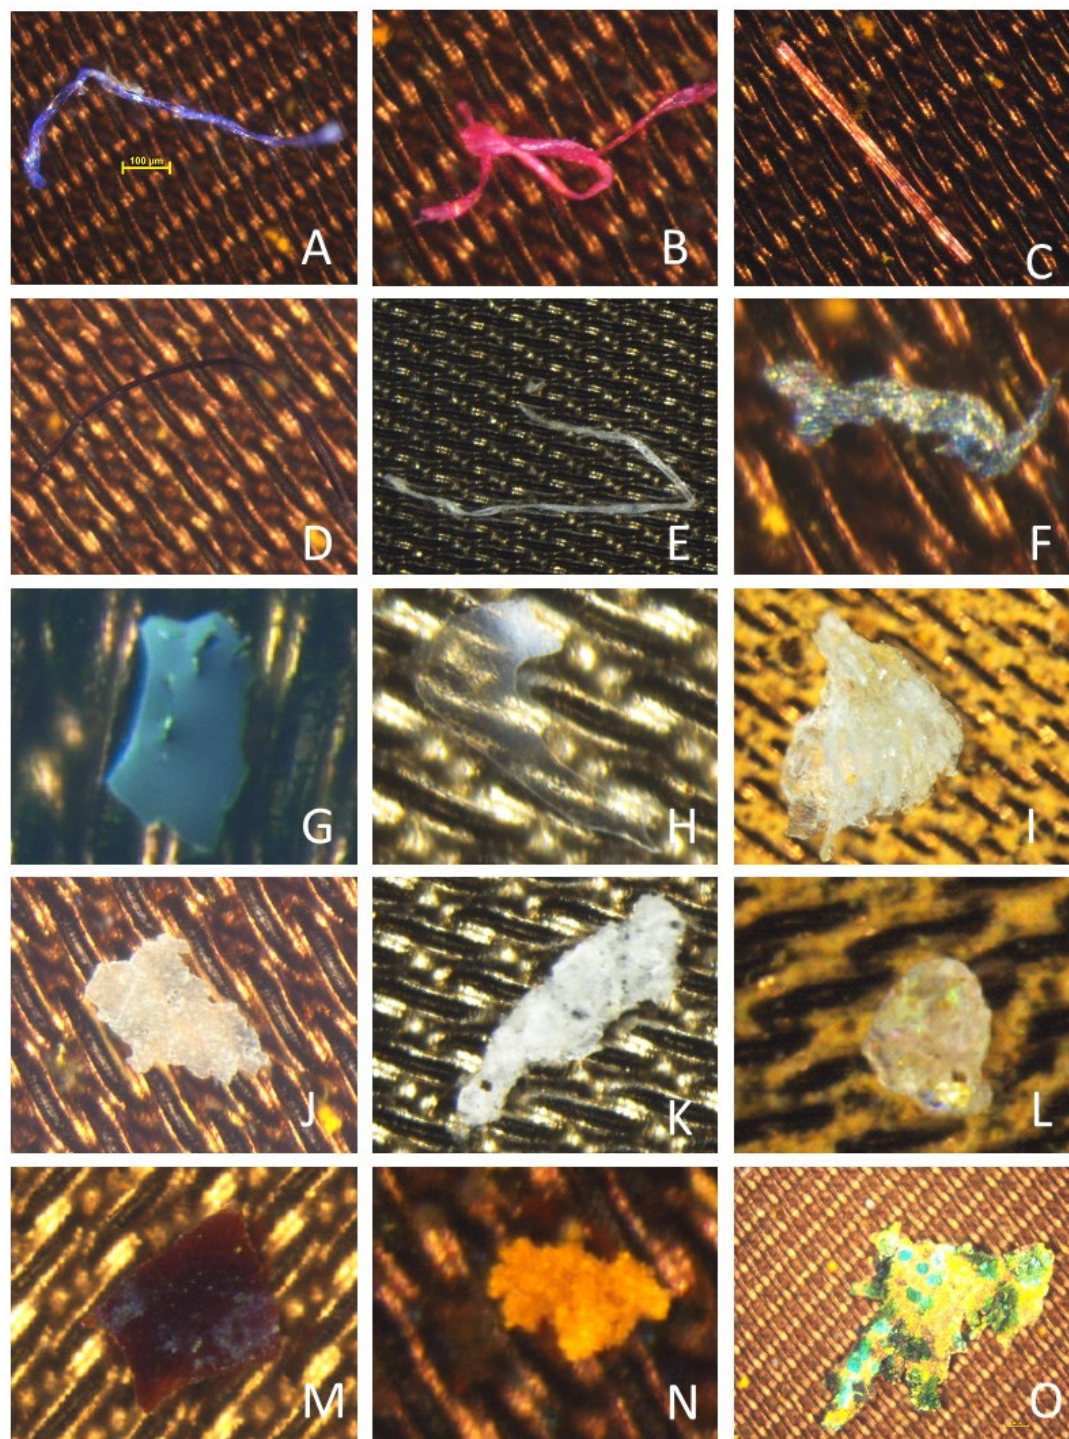

Table S2. Quantification of MP-like particles >100 µm in blank samples. From each of the five blank samples, the total number of MP-like particles as well as the specific numbers of MP-like fibres, fragments and films are shown. The counts were obtained by visual stereomicroscopy and are shown as total numbers per sample. A subset of 48% of all MP-like particles were representatively selected from each sample for verification by µFTIR and results of the identification are shown. PMMA = poly(methyl methacrylate), PET = polyethylene terephthalate and EVA = ethylene-vinyl acetate.

| Blank sample | Total No. MP-like particles | Total No. MP-like fibres<br>Number | Total No. MP-like fragments | Total No. MP-like films | Identification of MP-like particles using µFTIR<br>Subset of particles selected for validation                                                               |
|--------------|-----------------------------|------------------------------------|-----------------------------|-------------------------|--------------------------------------------------------------------------------------------------------------------------------------------------------------|
| Blank 1      | 5                           | 4                                  | 1                           | 0                       | PMMA - 1<br>Cellulosic - 1                                                                                                                                   |
| Blank 2      | 9                           | 7                                  | 0                           | 2                       | PET - 1<br>Cellulosic - 6<br>Unknown - 2                                                                                                                     |
| Blank 3      | 9                           | 9                                  | 0                           | 0                       | Cellulosic - 5<br>Proteinaceous - 1<br>Poor spectra - 1                                                                                                      |
| Blank 4      | 14                          | 11                                 | 3                           | 0                       | Cellulosic - 3<br>Proteinaceous - 1                                                                                                                          |
| Blank 5      | 29                          | 26                                 | 3                           | 0                       | EVA copolymer - 1<br>EVA - 1<br>Cellulosic - 5<br>Proteinaceous - 3                                                                                          |
| Mean ± STD   | 13.2 ± 9.4                  | 11.4 ± 8.6                         | 0.8 ± 1.3                   | 0.4 ± 0.9               | 6.4 ± 3.4                                                                                                                                                    |
| Total        | 66                          | 57 (86%)                           | 7 (11%)                     | 2 (3%)                  | <u>32 Particles (48%):</u><br>PMMA - 1<br>PET - 1<br>EVA copolymer - 1<br>EVA - 1<br>Cellulosic - 20<br>Proteinaceous - 5<br>Unknown - 2<br>poor spectra - 1 |

Table S3. Quantification of MP-like particles >100 µm in 50L tap water samples. From each of the 17 Danish sampling sites, the total number of MP-like particles as well as the specific numbers of MP-like fibres, fragments and films are shown. The counts were obtained by visual stereomicroscopy and are shown as total number of particles per 50 L sample. A subset of 44% of all MP-like particles were representatively selected for µFTIR identification. From site 1, two water samples (a, b) were obtained from two different sampling days. PP = polypropylene, PS = polystyrene and PET = polyethylene terephthalate.

| Sampling site | Total No. MP-like particles in 50 L | Total No. MP-like fibers in 50 L | Total No. MP-like fragments in 50 L | Total No. MP-like films in 50 L | Identification of MP-like particles using µFTIR<br>Subset of particles selected for validation |
|---------------|-------------------------------------|----------------------------------|-------------------------------------|---------------------------------|------------------------------------------------------------------------------------------------|
| 1 a + b       | 29                                  | 25                               | 3                                   | 1                               | Cellulosic - 9                                                                                 |
|               | 18                                  | 13                               | 5                                   | 0                               | Cellulosic - 5<br>Poor spectra - 5                                                             |
| 2             | 16                                  | 14                               | 1                                   | 1                               | Cellulosic - 9                                                                                 |
| 3             | 12                                  | 12                               | 0                                   | 0                               | Cellulosic - 5                                                                                 |
| 4             | 13                                  | 8                                | 1                                   | 4                               | Cellulosic - 3<br>Proteinaceous - 2<br>Unknown - 1<br>Poor spectra - 1                         |
| 5             | 7                                   | 6                                | 1                                   | 0                               | Cellulosic - 4<br>Poor spectra - 1                                                             |
| 6             | 21                                  | 19                               | 2                                   | 0                               | Cellulosic - 2<br>Unknown - 1                                                                  |
| 7             | 10                                  | 10                               | 0                                   | 0                               | PP - 1<br>Cellulosic - 7                                                                       |
| 8             | 30                                  | 20                               | 7                                   | 3                               | PS - 1<br>Cellulosic - 4<br>Proteinaceous - 1<br>Unknown - 1<br>Poor spectra - 1               |
| 9             | 12                                  | 10                               | 1                                   | 1                               | Cellulosic - 4<br>Unknown - 2                                                                  |
| 10            | 13                                  | 13                               | 0                                   | 0                               | Cellulose - 7<br>Poor spectra - 1                                                              |
| 11            | 11                                  | 10                               | 0                                   | 1                               | Cellulosic - 6                                                                                 |
| 12            | 27                                  | 20                               | 7                                   | 0                               | Cellulosic - 8                                                                                 |

|                   |                   |                   |                  |                  |                                                                                                                                                                                                |
|-------------------|-------------------|-------------------|------------------|------------------|------------------------------------------------------------------------------------------------------------------------------------------------------------------------------------------------|
|                   |                   |                   |                  |                  | Unknown - <b>1</b>                                                                                                                                                                             |
| <b>13</b>         | <b>9</b>          | <b>9</b>          | <b>0</b>         | <b>0</b>         | Cellulosic - <b>3</b><br>Proteinaceous - <b>1</b><br>Unknown - <b>1</b><br>poor spectra - <b>2</b>                                                                                             |
| <b>14</b>         | <b>4</b>          | <b>4</b>          | <b>0</b>         | <b>0</b>         | Cellulosic - <b>4</b>                                                                                                                                                                          |
| <b>15</b>         | <b>19</b>         | <b>14</b>         | <b>5</b>         | <b>0</b>         | <b>PP - 1</b><br>Cellulosic - <b>4</b>                                                                                                                                                         |
| <b>16</b>         | <b>17</b>         | <b>12</b>         | <b>5</b>         | <b>0</b>         | <b>PET - 1</b><br>Cellulosic - <b>6</b><br>unknown - <b>2</b>                                                                                                                                  |
| <b>17</b>         | <b>13</b>         | <b>12</b>         | <b>1</b>         | <b>0</b>         | Cellulosic - <b>4</b><br>Proteinaceous - <b>1</b><br>Poor spectra - <b>1</b>                                                                                                                   |
| <b>Mean ± STD</b> | <b>15.6 ± 7.1</b> | <b>12.8 ± 4.9</b> | <b>2.2 ± 2.9</b> | <b>0.6 ± 1.1</b> | <b>6.9 ± 2.0</b>                                                                                                                                                                               |
| <b>Total</b>      | <b>281</b>        | <b>231 (82%)</b>  | <b>39 (14%)</b>  | <b>11 (4%)</b>   | <u><b>124 Particles (44%):</b></u><br><b>PP - 2</b><br><b>PS - 1</b><br><b>PET - 1</b><br>Cellulosic - <b>94</b><br>Proteinaceous - <b>5</b><br>Unknown - <b>9</b><br>poor spectra - <b>12</b> |
